# Supplementary material
Source: Research Square preprint supplement (doi:10.21203/rs.3.rs-9162485/v1)
Supplement: Supplementary file 1 [file 67c8b72380491fb0583443ae.xlsx]

## Sheet: Table S1 - Multi-neighbourhood 
Integrated Care Board (ICB)	Population size of ICB	Count of GP practices in ICB	Count of AS-GPPs in ICB	Proportion of all AS-GPPs within ICB	Number of patients linked to at least 1 AS-GPP in ICB	Proportion of patients in ICB linked to at least 1 AS-GPP
NHS Dorset ICB	832310	69	0	0	0	0
NHS Black Country ICB	1340896	175	3	0.0168539	26841	0.0200172
NHS Devon ICB	1296872	118	2	0.011236	60346	0.046532
NHS Bristol North Somerset and South Gloucestershire ICB	1094366	75	1	0.00561798	100060	0.0914319
NHS Somerset ICB	607934	62	1	0.00561798	112113	0.184416
NHS Bedfordshire Luton and Milton Keynes ICB	1145237	87	1	0.00561798	231995	0.202574
NHS Mid and South Essex ICB	1292868	145	3	0.0168539	270975	0.209592
NHS Hertfordshire and West Essex ICB	1663241	128	2	0.011236	348627	0.209607
NHS Norfolk and Waveney ICB	1099615	105	2	0.011236	429767	0.390834
NHS Derby and Derbyshire ICB	1141498	113	4	0.0224719	457757	0.401014
NHS Herefordshire and Worcestershire ICB	832976	79	2	0.011236	335706	0.40302
NHS Shropshire Telford and Wrekin ICB	536234	50	2	0.011236	228790	0.426661
NHS Bath and North East Somerset Swindon and Wiltshire ICB	1011574	88	2	0.011236	487406	0.481829
NHS Frimley ICB	851259	67	2	0.011236	437529	0.513979
NHS Birmingham and Solihull ICB	1643600	178	4	0.0224719	921376	0.560584
NHS Staffordshire and Stoke on Trent ICB	1205709	142	2	0.011236	686666	0.569512
NHS Cheshire and Merseyside ICB	2797909	340	10	0.0561798	1611611	0.576006
NHS Lancashire and South Cumbria ICB	1866631	197	8	0.0449438	1159520	0.621183
NHS Northamptonshire ICB	848656	67	3	0.0168539	534398	0.629699
NHS Cambridgeshire and Peterborough ICB	1054836	87	3	0.0168539	665088	0.630513
NHS Suffolk and North East Essex ICB	1077716	91	2	0.011236	699023	0.648615
NHS North East and North Cumbria ICB	3229147	345	11	0.0617978	2183066	0.67605
NHS Greater Manchester ICB	3296924	408	10	0.0561798	2249940	0.682436
NHS Humber and North Yorkshire ICB	1812500	165	10	0.0561798	1296119	0.7151
NHS Kent and Medway ICB	2034995	181	6	0.0337079	1465278	0.72004
NHS Buckinghamshire Oxfordshire and Berkshire West ICB	2011326	155	4	0.0224719	1478161	0.734919
NHS South Yorkshire ICB	1525635	171	5	0.0280899	1343711	0.880755
NHS South West London ICB	1774290	175	7	0.0393258	1593055	0.897855
NHS Coventry and Warwickshire ICB	1116911	120	5	0.0280899	1012823	0.906807
NHS Surrey Heartlands ICB	1148219	100	5	0.0280899	1086602	0.946337
NHS Sussex ICB	1857607	156	5	0.0280899	1760148	0.947535
NHS Nottingham and Nottinghamshire ICB	1281280	129	6	0.0337079	1243456	0.97048
NHS North East London ICB	2468018	266	11	0.0617978	2431540	0.98522
NHS Cornwall and The Isles Of Scilly ICB	606089	56	1	0.00561798	605872	0.999642
NHS Hampshire and Isle Of Wight ICB	1969636	133	4	0.0224719	1969992	1.00018
NHS Leicester Leicestershire and Rutland ICB	1232955	129	5	0.0280899	1233403	1.00036
NHS South East London ICB	2121774	195	10	0.0561798	2122866	1.00051
NHS Gloucestershire ICB	695856	66	2	0.011236	696416	1.0008
NHS West Yorkshire ICB	2699101	266	10	0.0561798	2701622	1.00093
NHS Lincolnshire ICB	824403	81	2	0.011236	825763	1.00165
NHS North West London ICB	2906183	345	8	0.0449438	2913263	1.00244
NHS North Central London ICB	1831272	176	11	0.0617978	1836572	1.00289
