# Supplementary material
Source: Research Square preprint supplement (doi:10.21203/rs.3.rs-9162485/v1)
Supplement: Supplementary file 1 [file a2cf4cdd334afb28b92c2c22.docx]

**Supplementary file 1**

Table S1: List of terms used to identify relevant providers with the CQC

| provider alliance | alliance |
| --- | --- |
| together | federation |
| federated | gp federation |
| provider | collective |
| consortium | collaborative |
| network | unity |
| united | health partnership |
| association | cooperative |
| co-operative | cluster |
| hub | primary care network |
| pcn | care alliance |
| health alliance | medical group |
| gp group | practice group |
| primary care group | networks |
| CIC | Community Interest Company |
| Ltd | Limited |
| LLP | Limited Liability Partnership |
| PLC |  |

Table S2: Data extraction form. Data extraction was performed online using Microsoft Forms

| Question | Response type | Notes |
| --- | --- | --- |
| Name of the provider | Free text |  |
| Date of assessment | Date |  |
| Assessment type | - First or second assessment - Third assessment - Discrepancy resolution | Select one |
| Do you think this might be a duplicate or have a similar name to another | yes/no |  |
| Initials of extractor | Free text |  |
| Website for the organisation | URL (text) |  |
| Does this organisation provide NHS care? If it is a care home then tick 'no | yes/no | If no, exclude from list and go no further |
| Does this organisation provide primary medical services | yes/no | If no, exclude from list and go no further |
| Does this organisation provide GP services (ie. NOT EXCLUSIVELY pharmacy, optometry, dentistry, physiotherapy) | yes/no | If no, exclude from list and go no further |
| Is this organisation a small-scale practice provider? ie. a single group practice that is clearly less than 100,000 patients? If yes, the form will be completed. | yes/no | If yes, exclude from list and go no further |
| Number of patients served according to the website of the provider only | Raw number / not specified |  |
| What broad activities does this provider do for its associated practices? | Categories   - Core GP services, including home visits - Out of hours services, including extended access - Emergency care / urgent care centres / walk-in centres - Enhanced primary care services - dermatology, minor surgery, physiotherapy, inclusion - At-scale back-office support - any non-clinical service provided to more than one practice. HR, training, estates, research, population health management, etc. - Psychosocial interventions, eg. smoking cessation, counselling, link workers, social prescribing - Diagnostic services eg. phlebotomy, radiology - Vaccination hub - Intermediate care services, frailty hubs, virtual wards, community emergency response teams - No information at all available | Select many |
| What is the form of this provider? Click all that apply. If you can't find it, try a Companies House or Mutuals Public Register search. If you still don't know then tick 'not sure / unknown' | - Primary Care Network - Federation - (Super)partnership - Community Interest Company - Private limited company - Company limited by guarantee - Limited Liability Partnership - Other provider alliance model - Not sure / unknown - Registered Society - Other (free text) | Select many |
| Is this organisation a Primary Care Network? | yes/no |  |
| Is this organisation an NHS trust? | Yes/no  If yes, specify if Acute, Community, Mental Health, Ambulance or Other |  |
| Does the provider serve only one ICB and its directly neighbouring ICBs? (this is the definition of 'contiguous geographical area') | yes/no |  |
| Which Integrated Care Boards are associated with this organisation, according to the website? Copy them as a list separated on new lines. | Multiple choice for the 42 ICBs |  |
| Geographical area served | Free text |  |
| List of practices associated | Free text | Copy them as a comma separated list/ If not obvious, write “Not Provided”. |
| Associated Primary Care Networks | Free text | Copy them as a comma separated list/ If not obvious, write “Not Provided”. |
| Is there a discrepancy between the total number of practices and the practices that are individually named on the website? | yes/no |  |
| Free text comments |  | For any comments about the organisation for discussion later |
| Overall, do you think this provider would meet our inclusion criteria | - Include - Exclude - Unsure |  |

Figure S1: Data extraction decision tree


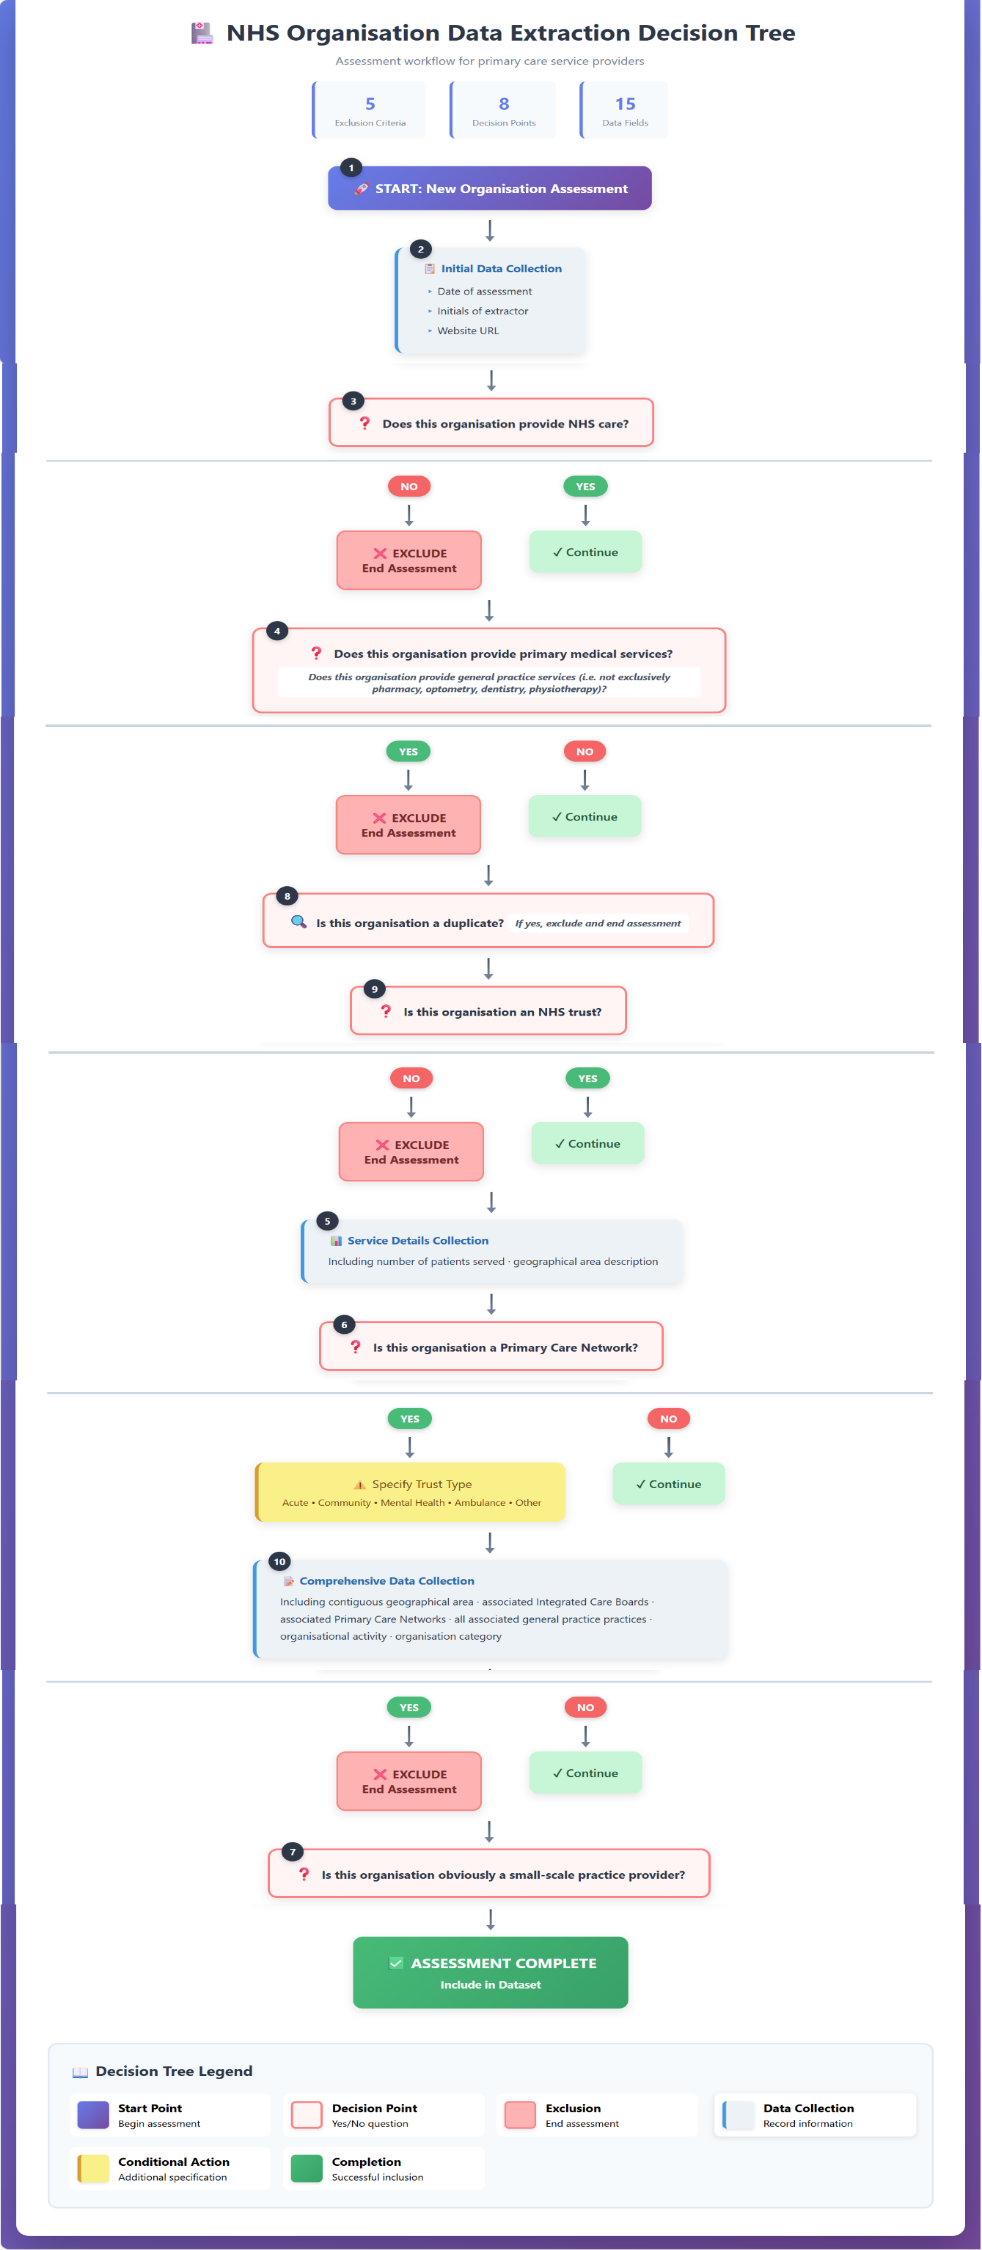


Figure S2: Screenshot 1 of 2 of review web application


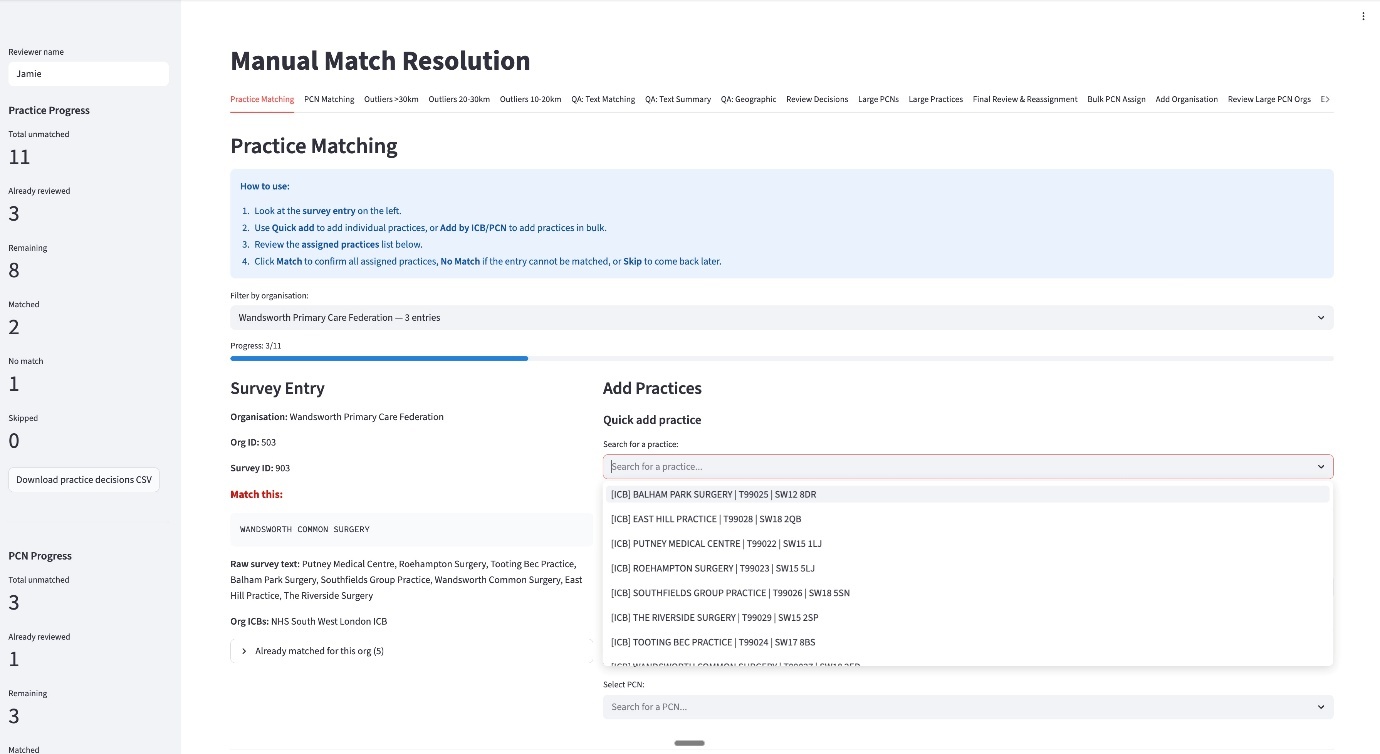


Figure S3: Screenshot 2 of 2 of review web application


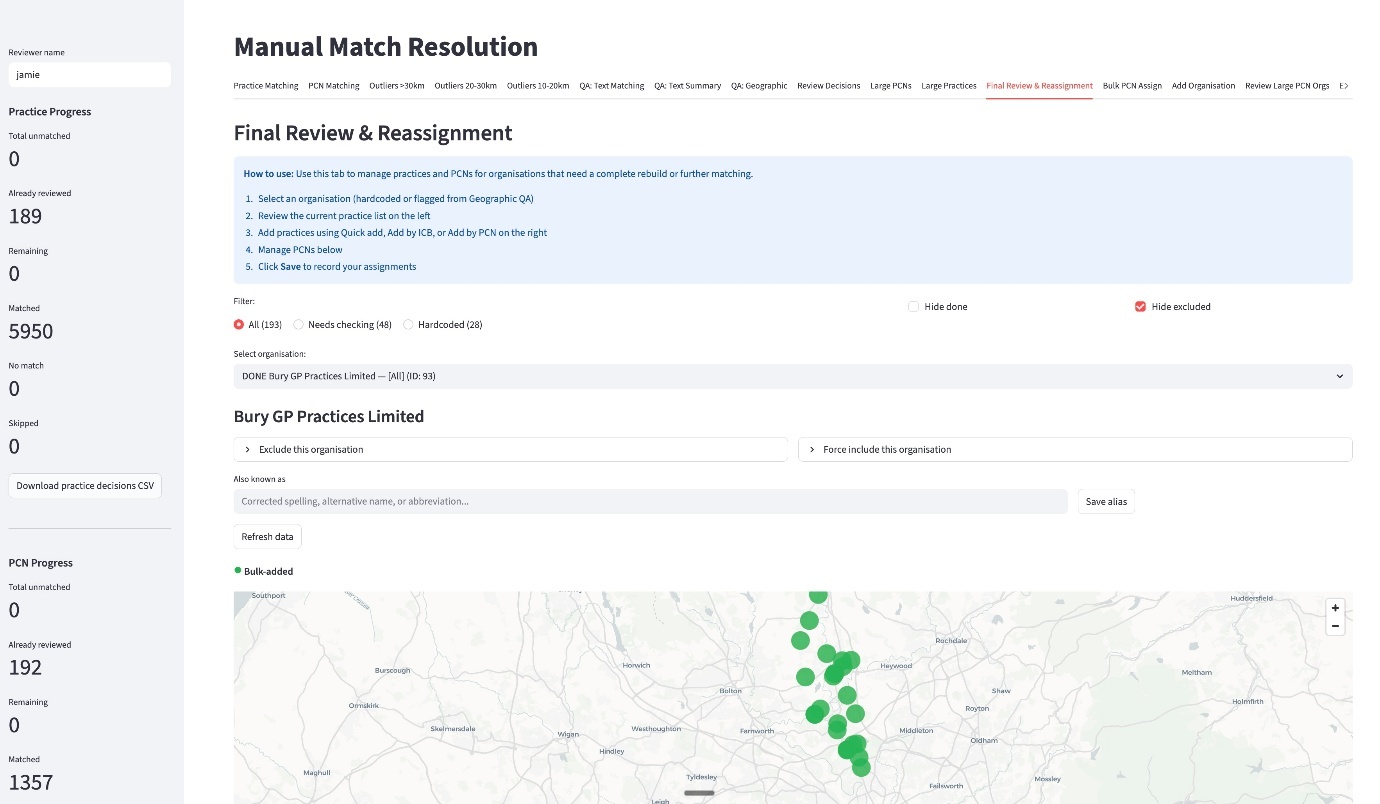


Table S3: Text matching of practices and PCN names from at-scale general practice provider websites to English GP practices

| **Stage** | **Input** | **Method** |
| --- | --- | --- |
| 1. Text normalisation and data cleaning | Free-text practice names from proforma | Common names removed, e.g. ‘medical practice’, ‘surgery’, ‘partners’. Long lists of practices split up into lists of practices. |
| 2. ICB-constrained fuzzy text matching | Names from stage 1 | Jaro-Winkler (JW) string distances computed between each name and all practices in the organisation’s ICB. Matched if there is a strong match. Ties are broken by geographic proximity to organisational centroid (i.e. the centroid of the coordinates of all currently associated practices) |
| 3. Geographic fuzzy matching | Remaining unmatched names from stage 2 | All practices within 50 km of organisation searched regardless of ICB. Matched only if there is a close match. |
| 4. Care Quality Commission (CQC) directory lookup | Remaining unmatched names from stage 3 | Fuzzy text matching against CQC location name, alternative name, and provider name fields. Matched CQC entry’s coordinates used to identify the nearest GP practice within 2km. |
| 5. Large language model matching | Remaining unmatched names from stage 4 | Unmatched names sent to a large language model (GPT-5) with the organisation’s ICB and PCN context. Model returns best match from candidate list.  Prompt example:  *You are an expert at matching NHS GP practice names. Match the survey name to the correct official practice name.*  ***SURVEY NAME TO MATCH:*** *"Brixton Road Medical Ctr"*  ***CANDIDATE PRACTICE NAMES (choose ONLY from this list of 5 closest matches):***   1. *Brixton Road Medical Centre* 2. *Brixton Health Centre* 3. *Brixworth Medical Centre* 4. *Brixton Surgery* 5. *Brixton Road Group Practice*   ***MATCHING RULES:***  *Common abbreviations: MC/Med Ctr = Medical Centre, Surg = Surgery, HC = Health Centre, Grp = Group, Prac = Practice*   - *Ignore: 'The', 'Dr/Drs', word order differences, punctuation* - *Consider typos and spelling variations* - *If multiple could match, pick the closest spelling* - *If NONE of these candidates are a good match, respond NO_MATCH*   ***RESPOND IN EXACTLY THIS FORMAT:*** *MATCH: [exact name from list OR NO_MATCH] CONFIDENCE: [HIGH/MEDIUM/LOW] REASON: [brief explanation, max 15 words]* |
| 6. Manual review | Remaining unmatched names from stage 5, presented in custom-built web application for matching to GP practice database | Trained reviewer selects correct match or confirms no match, with free-text notes. |

Table S4: Availability of NHS payments data by Integrated Care Board (ICB)

14 months from April 2024 to May 2025 were considered for analysis.

| Months of available data (out of 14 months) | Number of ICBs |
| --- | --- |
| 14 | 33 |
| 13 | 3 |
| 12 | 3 |
| 10 | 1 |
| 9 | 1 |
| 8 | 1 |

Table S5: Missing data table

| Variable | Count of missing data | Percentage of missing data (%) |
| --- | --- | --- |
| At-scale general practice providers | | |
| Provider size by survey collection | 81 | 49.09 |
| Provider size by linked practices | 0 | 0 |
| Number of linked practices | 0 | 0 |
| Income Deprivation Score | 0 | 0 |
| Proportion Patients of White Ethnicity | 0 | 0 |
| Average Population Density (people per sq. km) | 0 | 0 |
| Proportion Patients Aged ≤ 4 years | 0 | 0 |
| Proportion Patients Aged ≥ 65 years | 0 | 0 |
| Emergency and Urgent Care | 8 | 4.85 |
| At scale back-office support | 8 | 4.85 |
| Enhanced Services | 8 | 4.85 |
| Core General Practice | 8 | 4.85 |
| Intermediate Care | 8 | 4.85 |
| Psychosocial Care | 8 | 4.85 |
| Out of Hours Work | 8 | 4.85 |
| Diagnostic Services | 8 | 4.85 |
| Vaccination Hubs | 8 | 4.85 |
| Federation OR Alliance | 0 | 0 |
| Super partnership | 0 | 0 |
| Primary Care Network | 0 | 0 |
| Other organisational structure | 0 | 0 |
| Integrated Care Board | 0 | 0 |
| General practices in England | | |
| Practice list size | 94 | 1.49 |
| Income Deprivation Score | 119 | 1.89 |
| Proportion Patients of White Ethnicity | 119 | 1.89 |
| Average Population Density (people per sq. km) | 119 | 1.89 |
| Proportion Patients Aged ≤ 4 years | 94 | 1.49 |
| Proportion Patients Aged ≥ 65 years | 94 | 1.49 |
| Integrated Care Board | 105 | 1.66 |
